# Supplementary material for: Serologic Susceptibility to Vaccine-Preventable Infections in Asylum-Seekers
Source: PubMed Central journal article supplement — N Engl J Med. Author manuscript; Available in PMC 2024 Nov 21. (PMC11581679; doi:10.1056/nejmc2403451), 2024-11-21
Supplement: NIHMS2030312-supplement-Supplement.pdf [file NIHMS2030312-supplement-Supplement.pdf]

|   |                                                                                    |
|---|------------------------------------------------------------------------------------|
| 1 | <b>Supplement to:</b>                                                              |
| 2 | Susceptibility to vaccine-preventable infections in unstably housed asylum-seekers |
| 3 |                                                                                    |
| 4 | <b>Table of Contents</b>                                                           |
| 5 | 1. Supplemental Methods                                                            |
| 6 | 2. Supplemental Results                                                            |
| 7 | 3. Supplemental References                                                         |
| 8 |                                                                                    |

## 9 **1. Supplemental Methods**

### 10 *Study Design*

11 We conducted a cross-sectional study of people seeking asylum and experiencing  
12 homelessness in New York City who sought primary care from January to November  
13 2023 in RyanHealth, a federally qualified health center in New York City. We tested  
14 people for serologic evidence of immunity using immunoglobulin G (IgG) testing against  
15 varicella, measles, mumps, rubella, hepatitis A, and hepatitis B. We characterized an  
16 equivocal or indeterminate laboratory result as not having evidence of immunity, or  
17 being susceptible to the infection, and we excluded people who did not complete any  
18 testing.

19

### 20 *Description of Assays*

21 We used the DiaSorin LIAISON® chemiluminescent immunoassays to test for measles,  
22 mumps, rubella, and varicella. We used the Siemens Atellica® chemiluminescent  
23 immunoassays to test for hepatitis A total antibody and hepatitis B surface antibody.  
24 Sample collection, storage, and transport were completed according to manufacturer  
25 specifications. Our clinical laboratory used Quest Diagnostics for sample processing  
26 with cut-off values consistent with the manufacturer specifications and package inserts.

27

### 28 *Inference of Protective Immunity*

29 Enzyme-linked immunosorbent assay (EIA)-based methods of measuring IgG titer, such  
30 as the ones used in this study, are commonly used to determine protective immunity  
31 even though they are not functional assays. The predictive capacity of EIA-based tests

32 varies based on several factors, but generally performs well for the infections evaluated  
33 in this study. For example, the reference standard used to determine protective  
34 immunity in measles is the plaque reduction neutralization test, which is technically  
35 challenging and not feasible to employ in high volume clinical settings.<sup>1</sup> The assay we  
36 used to detect measles IgG has been shown to have a high sensitivity when compared  
37 to that reference standard, particularly for IgG-negative sera.<sup>2,3</sup> The US Centers for  
38 Disease Control and Prevention (CDC) recommend the use of EIA-based IgG  
39 measurements to estimate the presence of protective immunity against these vaccine-  
40 preventable infections.<sup>4-7</sup> None of the serologic tests used in this study could distinguish  
41 between vaccine-derived or infection-derived immunity.

42

#### 43 *Statistical Analysis*

44 We used multivariable logistic regression to determine adjusted odds ratios (aOR) of  
45 demographic factors associated with serologic immunity to all tested conditions. We  
46 categorized ages into children (<13 years), adolescents/ young adults (13- 21y), and  
47 adults (>21y). As part of their clinical care, all patients had data collected regarding their  
48 country of origin and migration history. We grouped countries into regions based on  
49 their population in the sample. We defined secondary migration as residence >1 year in  
50 a different country after displacement prior to entering the US. We received ethical  
51 approval for this study from RyanHealth review board and non-human subjects research  
52 status from the MassGeneral Brigham ethical review board.

53

54

55 **2. Supplemental Results**

56 Supplement Table 1. Multivariable logistic regression of factors associated with

57 susceptibility to measles

| <b>Characteristic</b>      | <b>Adjusted Odds Ratio (95% CI)</b> |
|----------------------------|-------------------------------------|
| <b>Age Group</b>           |                                     |
| Adult (>21y)               | Reference                           |
| Child (<13y)               | 1.69 (1.24- 2.30)                   |
| Adolescent (13- 21y)       | 2.10 (1.37- 3.19)                   |
| <b>Sex</b>                 |                                     |
| Female                     | Reference                           |
| Male                       | 1.20 (0.92- 1.57)                   |
| <b>Region of Origin</b>    |                                     |
| Venezuela                  | Reference                           |
| Mexico/ Central America    | 1.50 (0.86- 2.60)                   |
| Caribbean                  | 0.88 (0.43- 1.70)                   |
| Ecuador                    | 1.25 (0.87- 1.79)                   |
| Other<br>(South America)   | 0.94 (0.65- 1.34)                   |
| Other<br>(Africa, Asia)    | 0.84 (0.41- 1.64)                   |
| <b>Secondary Migration</b> |                                     |
| No/ Unknown                | Reference                           |
| Yes                        | 1.10 (0.68- 1.75)                   |

58

59 Supplement Table 2. Multivariable logistic regression of factors associated with  
 60 susceptibility to varicella

| <b>Characteristic</b>      | <b>Adjusted Odds Ratio (95% CI)</b> |
|----------------------------|-------------------------------------|
| <b>Age Group</b>           |                                     |
| Adult (>21y)               | Reference                           |
| Child (<13y)               | 9.85 (6.81- 14.59)                  |
| Adolescent (13- 21y)       | 4.90 (3.02- 8.01)                   |
| <b>Sex</b>                 |                                     |
| Female                     | Reference                           |
| Male                       | 1.35 (1.02- 1.78)                   |
| <b>Region of Origin</b>    |                                     |
| Venezuela                  | Reference                           |
| Mexico/ Central America    | 1.14 (0.63- 2.06)                   |
| Caribbean                  | 1.19 (0.59- 2.37)                   |
| Ecuador                    | 0.91 (0.63- 1.32)                   |
| Other (South America)      | 0.62 (0.43- 0.89)                   |
| Other (Africa, Asia)       | 0.58 (0.27- 1.20)                   |
| <b>Secondary Migration</b> |                                     |
| No/ Unknown                | Reference                           |
| Yes                        | 0.94 (0.55- 1.58)                   |

61

62

63 Supplement Table 3. Multivariable logistic regression of factors associated with  
 64 susceptibility to hepatitis A

| <b>Characteristic</b>      | <b>Adjusted Odds Ratio (95% CI)</b> |
|----------------------------|-------------------------------------|
| <b>Age Group</b>           |                                     |
| Adult (>21y)               | Reference                           |
| Child (<13y)               | 5.69 (4.07- 8.09)                   |
| Adolescent (13- 21y)       | 5.52 (3.54- 8.65)                   |
| <b>Sex</b>                 |                                     |
| Female                     | Reference                           |
| Male                       | 0.90 (0.69- 1.18)                   |
| <b>Region of Origin</b>    |                                     |
| Venezuela                  | Reference                           |
| Mexico/ Central America    | 1.76 (0.98- 3.12)                   |
| Caribbean                  | 1.40 (0.69- 2.74)                   |
| Ecuador                    | 1.78 (1.25- 2.56)                   |
| Other (South America)      | 1.07 (0.74- 1.52)                   |
| Other (Africa, Asia)       | 1.69 (0.86- 3.26)                   |
| <b>Secondary Migration</b> |                                     |
| No/ Unknown                | Reference                           |
| Yes                        | 0.79 (0.45- 1.33)                   |

65

66

67 Supplement 4. Multivariable logistic regression of factors associated with immunity to all  
 68 tested conditions

| <b>Characteristic</b>      | <b>Adjusted Odds Ratio (95% CI)</b> |
|----------------------------|-------------------------------------|
| <b>Age Group</b>           |                                     |
| Adult (>21y)               | Reference                           |
| Child (<13y)               | 0.83 (0.53- 1.32)                   |
| Adolescent (13- 21y)       | 0.96 (0.61- 1.55)                   |
| <b>Sex</b>                 |                                     |
| Female                     | Reference                           |
| Male                       | 0.75 (0.55- 1.01)                   |
| <b>Region of Origin</b>    |                                     |
| Venezuela                  | Reference                           |
| Mexico/ Central America    | 0.18 (0.05- 0.45)                   |
| Caribbean                  | 0.67 (0.32-1.31)                    |
| Ecuador                    | 0.42 (0.27- 0.65)                   |
| Other<br>(South America)   | 0.82 (0.57- 1.18)                   |
| Other<br>(Africa, Asia)    | 1.16 (0.59- 2.17)                   |
| <b>Secondary Migration</b> |                                     |
| No/ Unknown                | Reference                           |
| Yes                        | 1.27 (0.80- 2.01)                   |

69 Footnote:

70 Tested conditions include Varicella, Measles, Mumps, Rubella, hepatitis A, and hepatitis

71 B.

72

73 **Supplement References**

- 74 1. Cohen BJ, Audet S, Andrews N, Beeler J. Plaque reduction neutralization test for  
75 measles antibodies: Description of a standardised laboratory method for use in  
76 immunogenicity studies of aerosol vaccination. *Vaccine* 2007;26(1):59–66.
- 77 2. Latner DR, Sowers SB, Anthony K, et al. Qualitative Variation among Commercial  
78 Immunoassays for Detection of Measles-Specific IgG. *J Clin Microbiol*  
79 2020;58(6):e00265-20.
- 80 3. Lutz CS, Hasan AZ, Bolotin S, et al. Comparison of measles IgG enzyme  
81 immunoassays (EIA) versus plaque reduction neutralization test (PRNT) for  
82 measuring measles serostatus: a systematic review of head-to-head analyses of  
83 measles IgG EIA and PRNT. *BMC Infect Dis* 2023;23(1):367.
- 84 4. Centers for Disease Control and Prevention. Measles Serology. Available from:  
85 <https://www.cdc.gov/measles/lab-tools/serology.html>
- 86 5. Centers for Disease Control and Prevention. Serology Testing for Rubella and  
87 Congenital Rubella Syndrome (CRS). Available from:  
88 <https://www.cdc.gov/rubella/lab/serology.html>
- 89 6. Centers for Disease Control and Prevention. Interpreting laboratory tests. Available  
90 from: <https://www.cdc.gov/chickenpox/lab-testing/lab-tests.html>
- 91 7. Lee D, Weinberg M, Benoit S. Evaluation of Measles-Mumps-Rubella vaccination  
92 among newly arrived refugees. *American Journal of Public Health* 2017;107(5):684–  
93 6.

94
